# Supplementary material for: Endothelial Hey2 deletion reduces endothelial-to-mesenchymal transition and mitigates radiation proctitis in mice
Source: Springer Nature journal article supplement (doi:10.1038/s41598-017-05389-8), 2017-07-04
Supplement: 41598_2017_5389_MOESM1_ESM.pdf [file 41598_2017_5389_MOESM1_ESM.pdf]

# Endothelial Hey2 deletion reduces endothelial-to-mesenchymal transition and mitigates radiation proctitis in mice.

Elodie Mintet<sup>1,4</sup>, Jérémy Lavigne<sup>1,4</sup>, Vincent Paget<sup>1</sup>, Georges Tarlet<sup>1</sup>, Valérie Buard<sup>1</sup>, Olivier Guipaud<sup>1</sup>, Jean-Christophe Sabourin<sup>2</sup>, Maria-Luisa Iruela-Arispe<sup>3</sup>, Fabien Milliat<sup>1</sup> and Agnès François<sup>1\*</sup>.

## Supplementary data

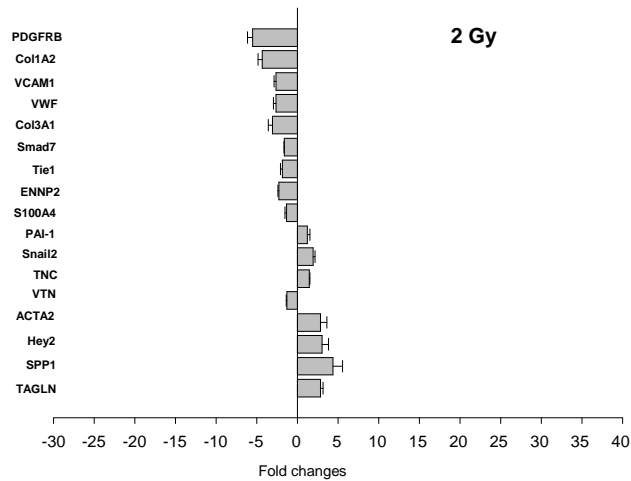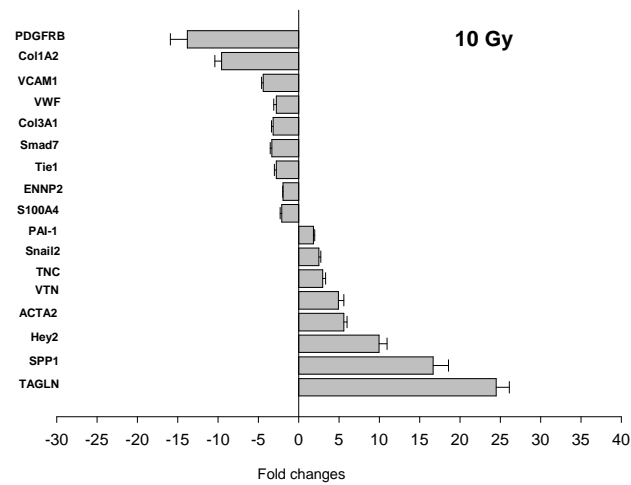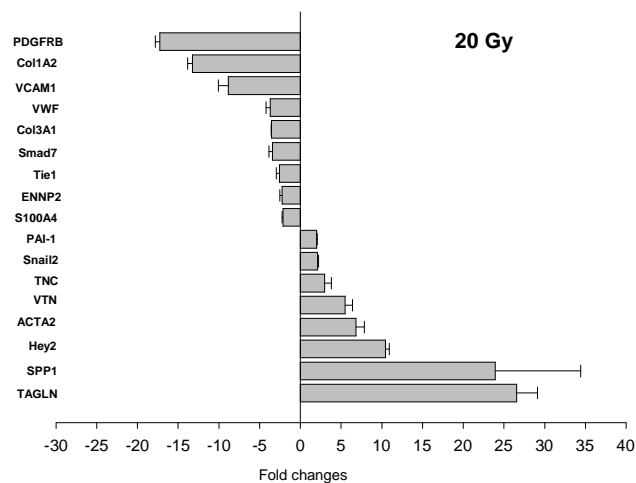

**Supplementary Figure 1 – Irradiation induces phenotypic conversion of endothelial cells resembling EndoMT.** Fold changes in mRNA expression profiles obtained in irradiated HUVECs 7 days after 2, 10 or 20 Gy exposure. Data are representative of 3 independent experiments performed in triplicate. Only statistically significant fold changes versus 0 Gy are shown ( $p < 0.05$ ).

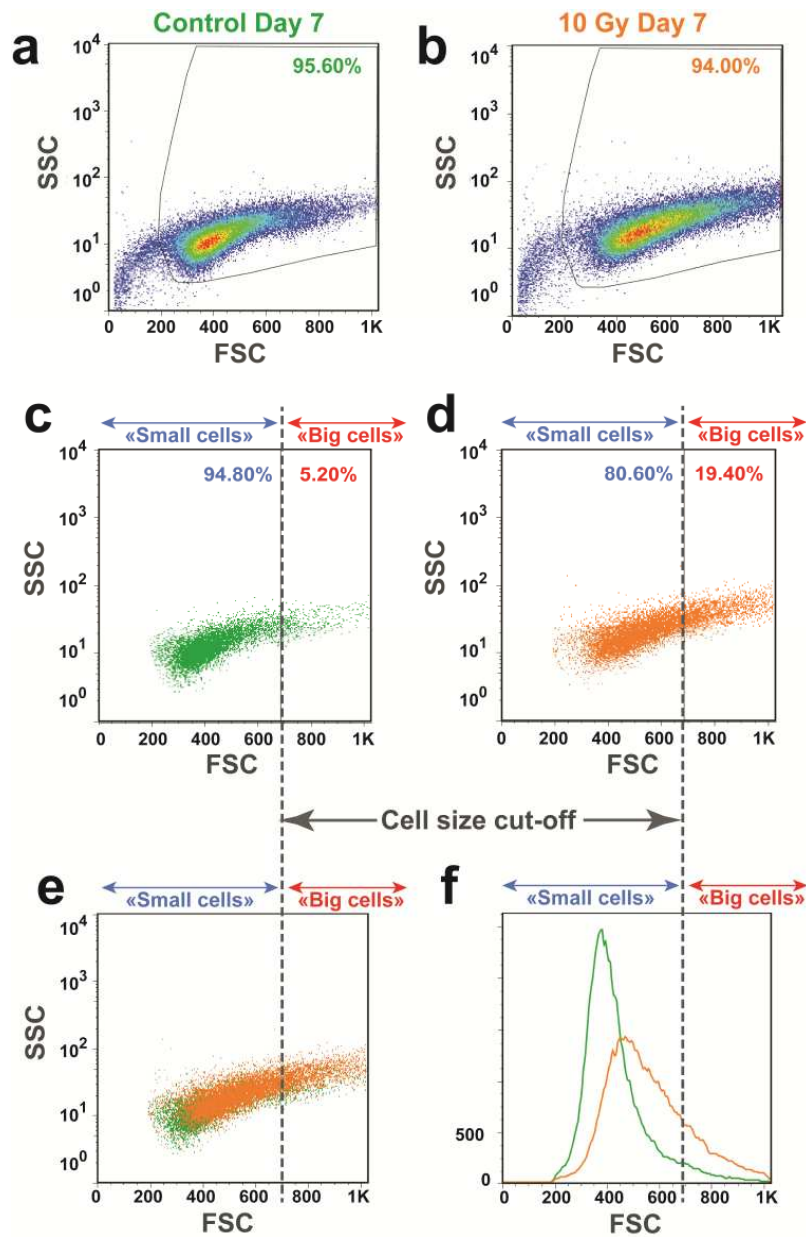

**Supplementary figure 2 – Gating and cell size cut-off based on FSC measurements.** Gating on living cell population is represented for control day 7 on panel (a) and on panel (b) for 10 Gy day 7. Cell size cut-off was set at around 5% for big cells on control day 7 (c) while this population represents around 19% on 10 Gy day 7 (d). Overlap feature and cell size cut-off of the two conditions are depicted on panels (e) and (f), as dot plot and histogram representation, respectively. Data represent one representative experiment among three independent experiments.

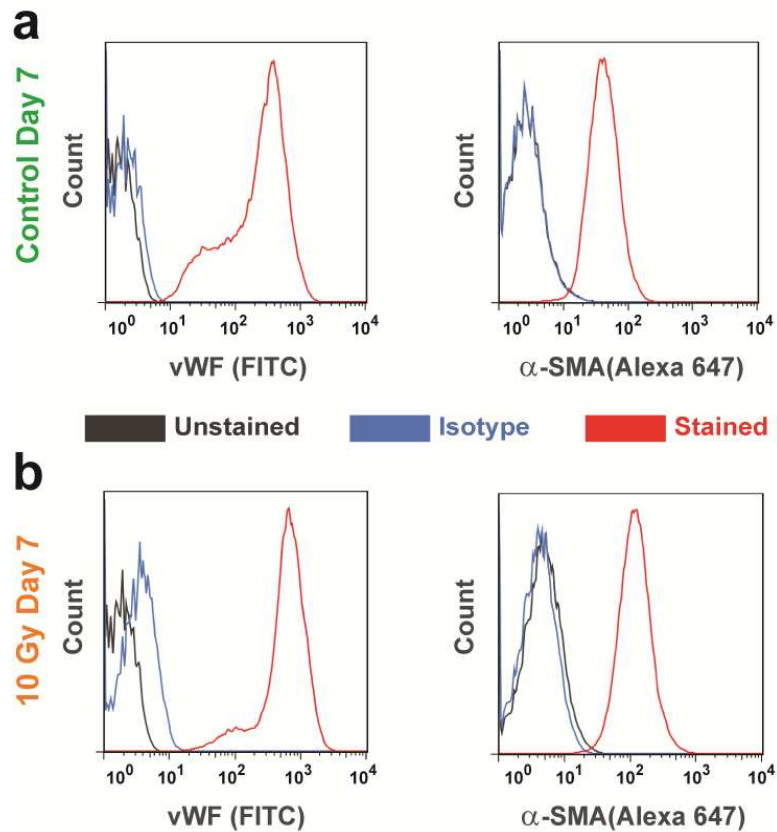

**Supplementary figure 3 – Isotype controls for  $\alpha$ -SMA/VWF double-staining on HUVECs.** Isotype antibodies (blue curves) were compared with unstained (gray curves) and stained cells (red curves) for control day 7 (a) and 10 Gy day 7 (b). Data represent one representative experiment among three independent experiments. For unstained and both isotypes, no overlap or false-positive signal was observed in the corresponding stained samples.

a

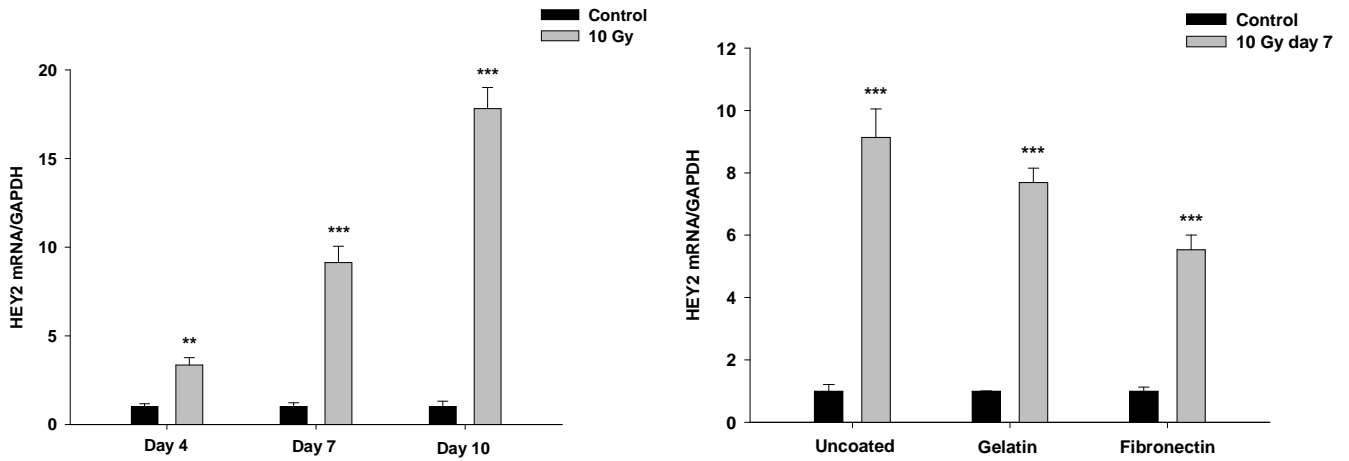

b

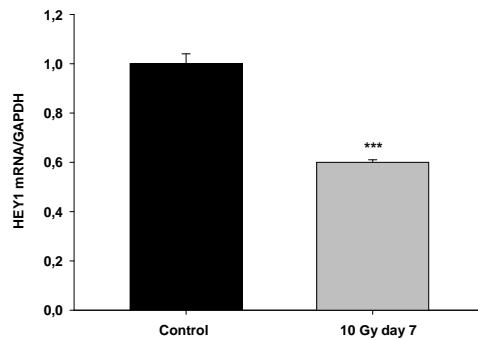

**Supplementary figure 4 – Radiation-induced Hey2 overexpression is progressive with time and independent of plastic coating and occurs together with Hey1 downregulation.** (a) Hey2 mRNA expression in 10 Gy-irradiated HUVECs was measured by qPCR 4, 7 and 10 days post-exposure. For the 10 Gy 7 days time point, Hey2 mRNA expression was measured in HUVECs cultured on uncoated, gelatin- or fibronectin-coated plastic with no influence on Hey2 expression modifications. (b) Hey1 mRNA expression levels in control and 10 Gy-irradiated HUVECs. Data are representative of three independent experiments performed in triplicate. \*\* $p < 0.01$ ; \*\*\* $p < 0.001$ .

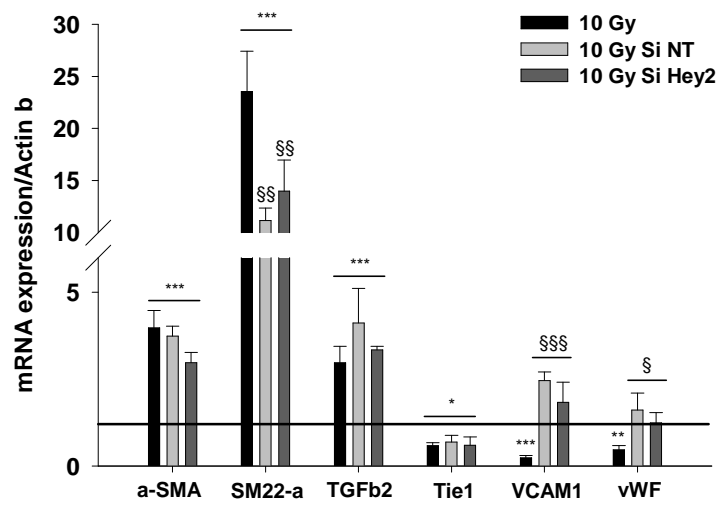

**Supplementary figure 5** – mRNA expression levels measured by qPCR in 10 Gy-irradiated, previously untransfected, non-targeting (NT) siRNA- or Hey2-SiRNA-transfected HUVECs compared with control unirradiated cells (retrieved to 1, barr), 7 days after irradiation. Data are the mean  $\pm$  SD of one experiment performed in triplicate. \* $p < 0.05$ ; \*\* $p < 0.01$ ; \*\*\* $p < 0.001$  compared with unirradiated cells; §  $p < 0.05$ ; §§  $p < 0.01$ ; §§§  $p < 0.001$  compared with 10 Gy untransfected cells.

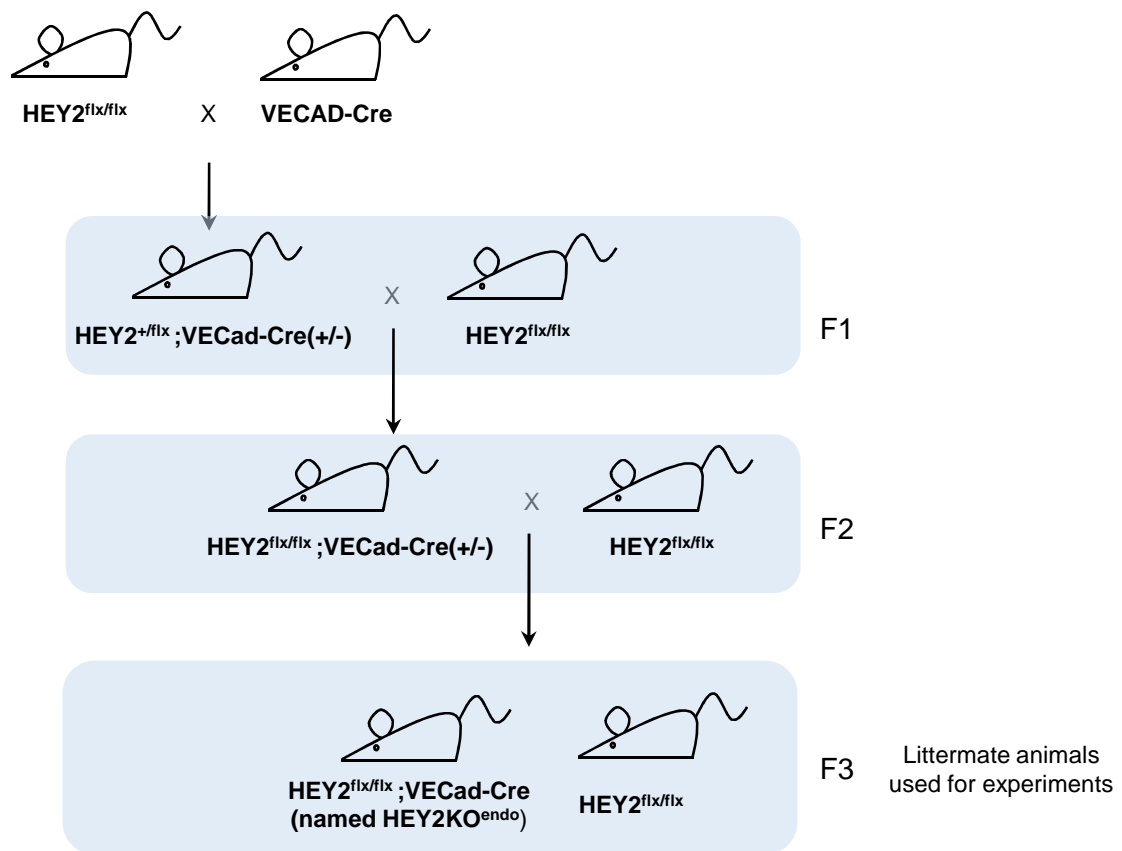

**Supplementary figure 6** – Global breeding scheme for producing transgenic mice for experiments.
